# Supplementary material for: Kaempherol and Luteolin Decrease Claudin-2 Expression Mediated by Inhibition of STAT3 in Lung Adenocarcinoma A549 Cells
Source: MDPI journal article supplement (doi:10.3390/nu9060597), 2017-06-13
Supplement: s1 [file s1]

Supplementary figure 1 Sonoki *et al.*

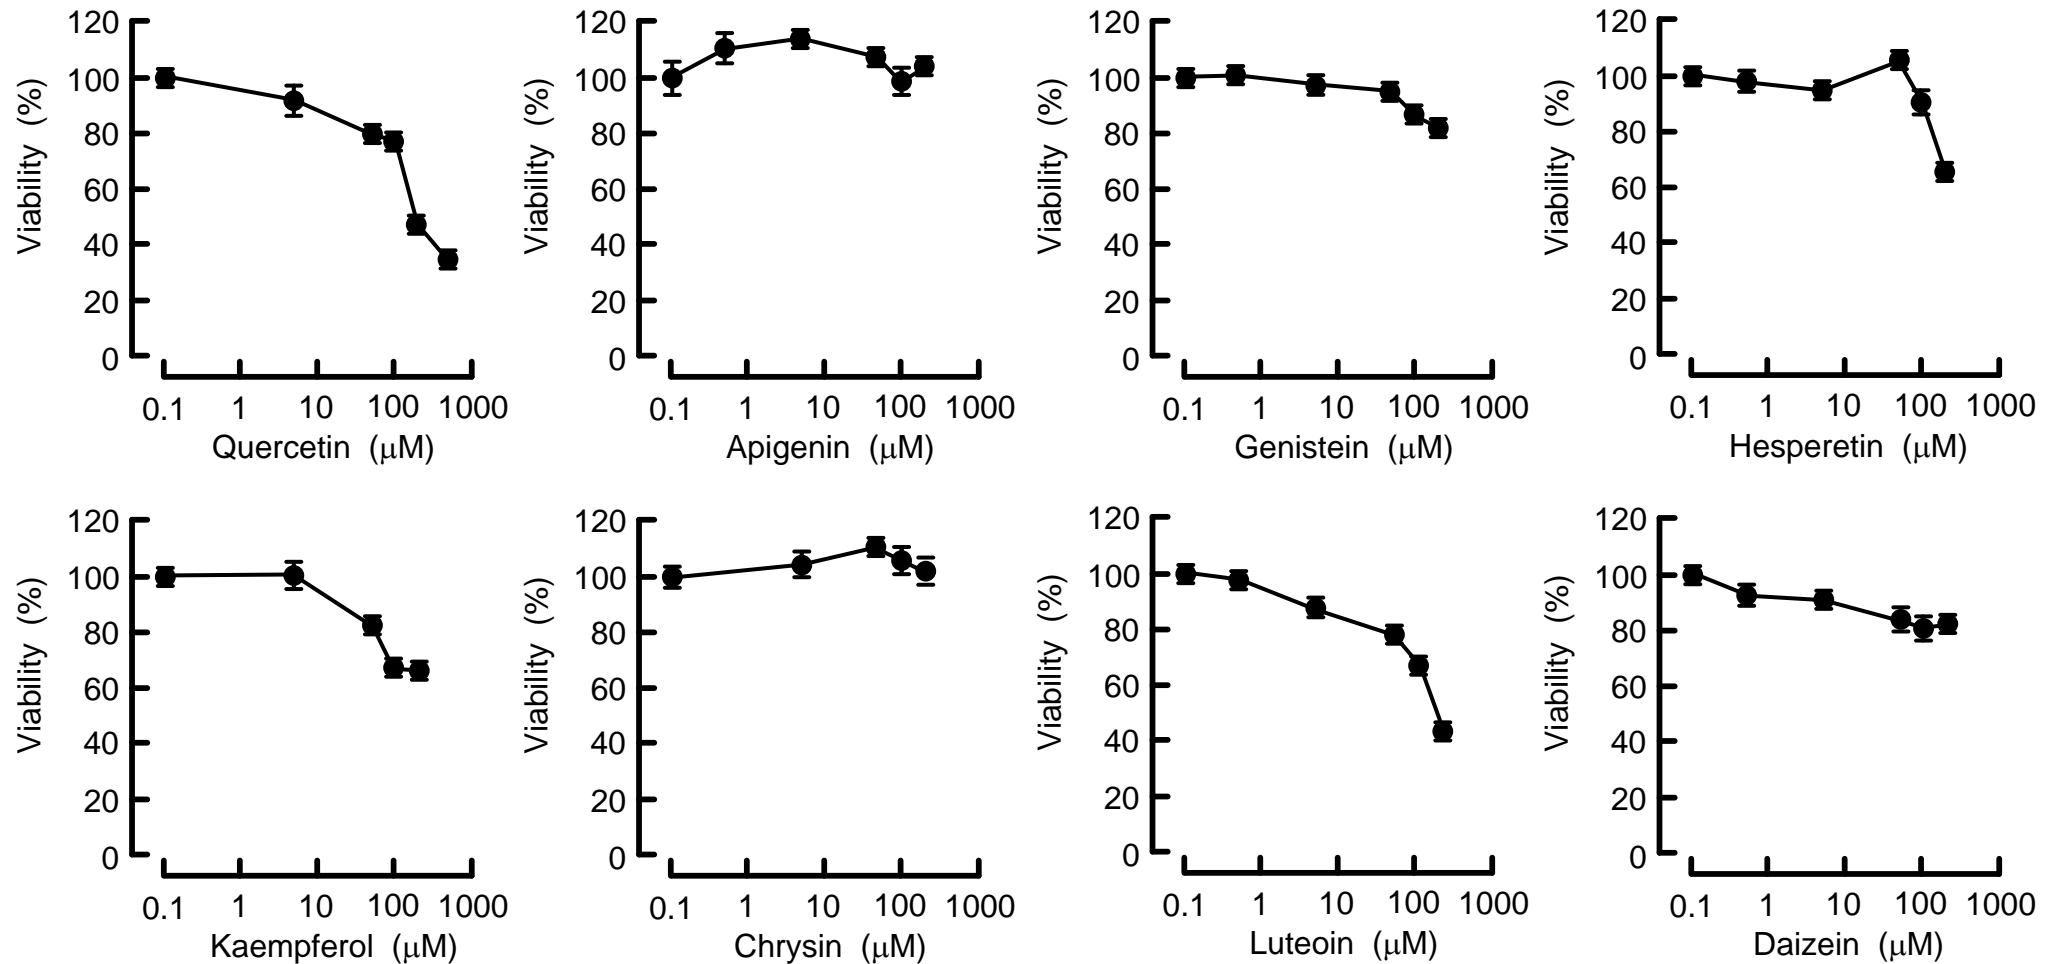

**Supplementary figure 1.** Effects of flavonoids on cell viability. A549 cells were incubated in the absence and presence of 50  $\mu\text{M}$  flavonoids for 24 h at the concentration indicated. Cell viability was assessed by WST-1 assay.
